# Supplementary material for: GSTO2 Isoforms Participate in the Oxidative Regulation of the Plasmalemma in Eutherian Spermatozoa during Capacitation
Source: MDPI journal article supplement (doi:10.3390/antiox8120601), 2019-11-29
Supplement: s1 [file s1]

|        |                                                                 |     |
|--------|-----------------------------------------------------------------|-----|
| mGSTO2 | MSGDLSRCLGKGSCPPGPVPEGVIRIYSMRFCPYSHRARLVLKAKGIRHEVININLKSKP    |     |
| bGSTO2 | MTDDATRTLKGKSIPPGPVPEGVIRLYSMRFCPYAHRTRLVLRAKGIRHEVININLRNKP    |     |
| mGSTO1 | MSGESSRSLGKGSAAPPGPVPEGQIRVYSMRFCPFAQRTLMLVLKAKGIRHEVININLKKNKP |     |
| bGSTO1 | MSGGSARSLGKGSAAPPGPVPEGLIRVYSMRFCPFAQRTLLVLNAKGIRHQVININLKKNKP  |     |
|        | *:. :* ***** ***** **:*****::*: :*.*****:*****:.*               |     |
|        |                                                                 | ↑   |
| mGSTO2 | DWYYTKHPFGQIPVLENSQCQLVYESVIACEYLDDVYPGRKLFPHYDPYERARQKMLLELF   |     |
| bGSTO2 | EWYFTKHPFGQIPVLENSKCQLIYESVIACEYLDDAYPGRKLYPHYDPYERARQKMLLELF   |     |
| mGSTO1 | EWFFEKNPLGLVPVLENSQGHLVTESVITCEYLDEAYPEKKLFPDDPYKKARQKMTLESF    |     |
| bGSTO1 | EWFFQKNPSGLVPVLENSQGQLIYESAITCEYLDEAYPGKKLLPDDPYEKACQKMFELS     |     |
|        | :*:* * :*****: *: *.*:*****:.* :* * ***:~* *** :*               |     |
| mGSTO2 | CKVPPLSKECLIALRCGRDCTDLKVALRQELCNMEEILEYQNTTFFGGDCISMIDYLVWP    |     |
| bGSTO2 | YKVPHLTKECLVALRCGRDCGDLKLALRQEFKNLEEILGYQNTVFFGGDCISMIDYLFWP    |     |
| mGSTO1 | SKVPPLIASF-VRSKRKEDSPNLREALNEFKKLEEGMDN-YKSFLGGDSPSMVDYLTWP     |     |
| bGSTO1 | SKVPPLLIRF-IRRENEADCSGLKEELRKEFSKLEEVLTKKKTTYFGGSSLISMIDYLIWP   |     |
|        | *** * : . *.*: *.*: :~* : . :~*.. *:~* **                       |     |
| mGSTO2 | WFERLDVYGLADCVNHTPMLRLWIASMKQDPAVCALHTDKSVFLGFLNLYFQNNPCAFDF    |     |
| bGSTO2 | WFERLEVYGIADCVNHTPALRLWIAAMKQDPTVCSLLTDKNTFLGFLNLYFQNNPGAFDY    |     |
| mGSTO1 | WFQRLAELELKECLAHTPKLKLWMAAMQQDPVASSHKIDAKTYREYLNLYLQDSPEACDY    |     |
| bGSTO1 | WFERLEALELNECIDHTPKLKLWMAAMMKDPAVSALHIEPRDLRAFNDLYLQNSPEACDY    |     |
|        | **:*~*:. :*: *** *:~*:*~* :~*...: : :~*:*~*.* * *:              |     |
| mGSTO2 | GLCNPIIR                                                        | 248 |
| bGSTO2 | GLSC----                                                        | 244 |
| mGSTO1 | GL-----                                                         | 240 |
| bGSTO1 | GL-----                                                         | 241 |
|        | **                                                              |     |

**Supplementary Figure 1. Mouse and Boar GSTO sequence comparison.** The mouse glutathione-s-transferase omega 2 (mGSTO2), boar glutathione-s-transferase omega 2 (bGSTO2), mouse glutathione-s-transferase omega 1 (mGSTO1) and boar glutathione-s-transferase omega 1 (bGSTO1) protein sequence alignment. The active site cysteine (aa32) is identified by a red arrow and the inhibitor (CellTracker C7025) binding site in each sequence is identified by a green underline. Fully conserved residues within the sequences are indicated by an asterisk (\*), residues with strong similarity are indicated by a colon (:), and weakly similar residues are indicated by a period (.). The inhibitor is a membrane permeable probe that covalently binds to the active site and fluoresces when bound.
