# Supplementary material for: GSTO2 Isoforms Participate in the Oxidative Regulation of the Plasmalemma in Eutherian Spermatozoa during Capacitation
Source: MDPI journal article supplement (doi:10.3390/antiox8120601), 2019-11-29
Supplement: s1 [file s1]

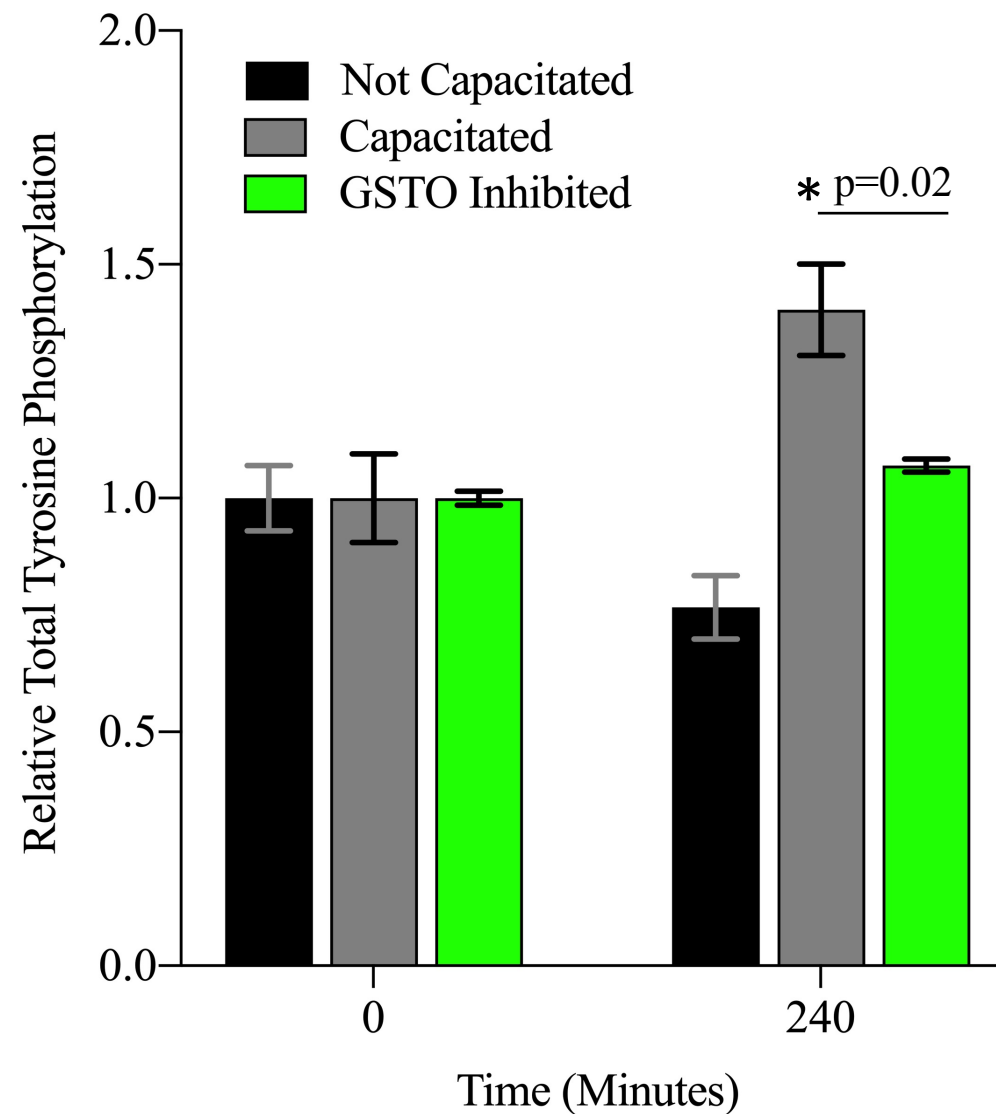

**Supplementary Figure 4. The level of protein tyrosine phosphorylation during *in vitro* capacitation in boar spermatozoa.** Samples were taken every 80 minutes during induced *in vitro* capacitation. Both capacitated and negative control (Not Capacitated) samples were kept in the same conditions to standardize all treatment groups. Total protein tyrosine phosphorylation levels were quantified using Image J and standardized through anti-alpha tubulin reactivity (Sigma, T6074). Tyrosine phosphorylation intensity measurements were adjusted so all time 0 measurements were an intensity of 1 to simplify the comparison. All measurements are the averages of three trials. Error bars represent standard error and \* signifies statistical different of p=0.02.
